# Supplementary material for: Synthesis of Zn3V2O8 nanoplatelets for lithium-ion battery and supercapacitor applications
Source: Royal Society of Chemistry journal article supplement (doi:10.1039/c5ra13904j), 2015-01-01
Supplement: c5ra13904j1.pdf [file c5ra13904j1.pdf]

## Electronic Supplementary Information (ESI)

# Synthesis of $\text{Zn}_3\text{V}_2\text{O}_8$ nanoplatelets for lithium-ion battery and supercapacitor applications

Subbukalai Vijayakumar, Seong-Hun Lee, Kwang-Sun Ryu\*

*Department of Chemistry and Energy Harvest Storage Research Center (EHSRC), University of Ulsan, Muger-dong, Nam-gu, Ulsan 680-749, Republic of Korea*

---

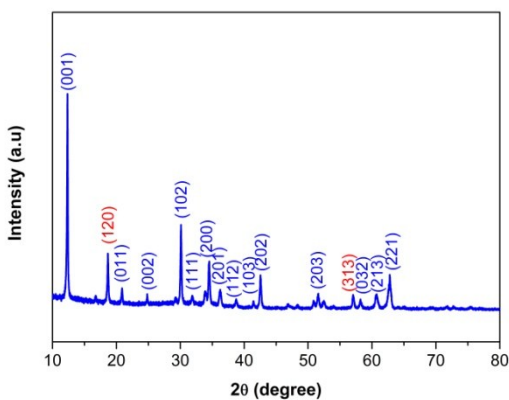

**Fig. S1.** XRD pattern of  $\text{Zn}_3\text{V}_2\text{O}_8$  precursor sample

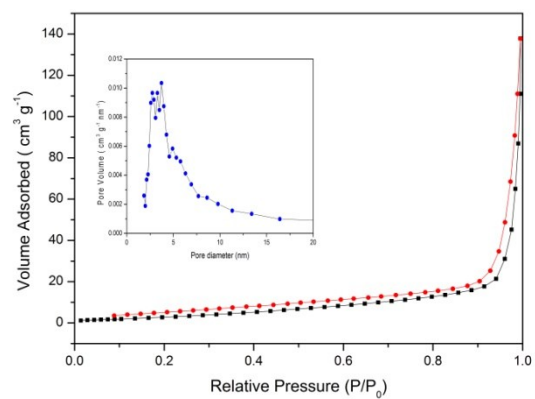

Fig. S2. BET isotherm of Zn<sub>3</sub>V<sub>2</sub>O<sub>8</sub> (Inset shows the pore size distribution curve)

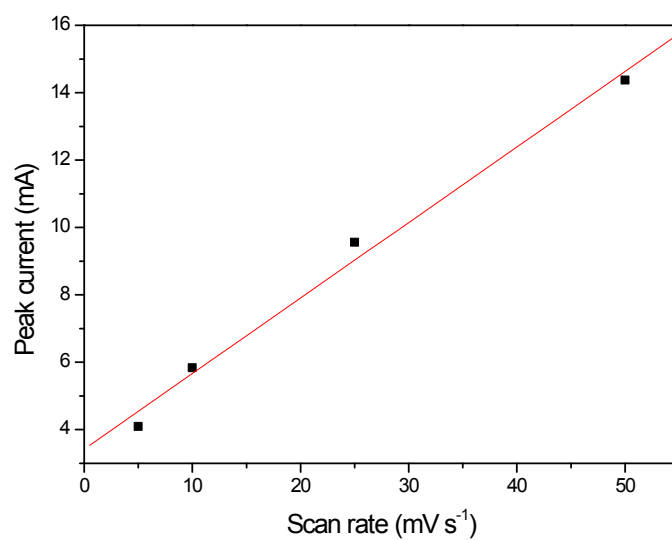

Fig. S3. Scan rate vs. Peak current curve
